# Supplementary material
Source: Springer Nature journal article supplement (https://www.springermedizin.de/resource/supplementary/12955_2006_286_MOESM2_ESM.pdf/9560064)
Supplement: MOESM2 [file 9560064]

# 多次元介護負担感尺度 (BIC-11)

介護についてお伺いします。

● 介護をしていて、下記の各項目のように思うことが、過去一ヶ月の間にどれくらいありましたか。あてはまる番号一つに○をつけてください。

1. 介護のために自分の時間が十分にとれない。

|        |          |      |      |       |
|--------|----------|------|------|-------|
| 全く思わない | ほとんど思わない | 時々思う | よく思う | いつも思う |
| 0      | 1        | 2    | 3    | 4     |

2. 介護のために自由に外出できない。

|        |          |      |      |       |
|--------|----------|------|------|-------|
| 全く思わない | ほとんど思わない | 時々思う | よく思う | いつも思う |
| 0      | 1        | 2    | 3    | 4     |

3. 介護をしていて何もかもいやになってしまう。

|        |          |      |      |       |
|--------|----------|------|------|-------|
| 全く思わない | ほとんど思わない | 時々思う | よく思う | いつも思う |
| 0      | 1        | 2    | 3    | 4     |

4. 介護を誰かにまかせてしまいたい。

|        |          |      |      |       |
|--------|----------|------|------|-------|
| 全く思わない | ほとんど思わない | 時々思う | よく思う | いつも思う |
| 0      | 1        | 2    | 3    | 4     |

5. 介護をしていてやりがいを感じられずつらい。

|        |          |      |      |       |
|--------|----------|------|------|-------|
| 全く思わない | ほとんど思わない | 時々思う | よく思う | いつも思う |
| 0      | 1        | 2    | 3    | 4     |

6. 介護をすることの意味を見いだせずつらい。

|        |          |      |      |       |
|--------|----------|------|------|-------|
| 全く思わない | ほとんど思わない | 時々思う | よく思う | いつも思う |
| 0      | 1        | 2    | 3    | 4     |

7. 介護をしていて体の痛みを感じる。

|        |          |      |      |       |
|--------|----------|------|------|-------|
| 全く思わない | ほとんど思わない | 時々思う | よく思う | いつも思う |
| 0      | 1        | 2    | 3    | 4     |

8. 介護のために自分の健康をそこなった。

|        |          |      |      |       |
|--------|----------|------|------|-------|
| 全く思わない | ほとんど思わない | 時々思う | よく思う | いつも思う |
| 0      | 1        | 2    | 3    | 4     |

9. 患者さんが介護サービスを嫌がるので困る。

|        |          |      |      |       |
|--------|----------|------|------|-------|
| 全く思わない | ほとんど思わない | 時々思う | よく思う | いつも思う |
| 0      | 1        | 2    | 3    | 4     |

10. 介護サービスが家に入ってくるのが負担である。

|        |          |      |      |       |
|--------|----------|------|------|-------|
| 全く思わない | ほとんど思わない | 時々思う | よく思う | いつも思う |
| 0      | 1        | 2    | 3    | 4     |

11. 全体的に見て、介護は自分にとってどのくらい負担であると思いますか。

|            |             |             |              |              |
|------------|-------------|-------------|--------------|--------------|
| 負担<br>ではない | 少し負担<br>である | やや負担<br>である | かなり負担<br>である | 非常に負担<br>である |
| 0          | 1           | 2           | 3            | 4            |
